# Supplementary material for: How 2-periodic coordination networks are interweaved: entanglement isomerism and polymorphism
Source: Royal Society of Chemistry journal article supplement (doi:10.1039/c7ce00313g), 2017-01-01
Supplement: c7ce00313g1.pdf [file c7ce00313g1.pdf]

## How 2-periodic coordination networks are interweaved: entanglement isomerism and polymorphism

Eugeny V. Alexandrov\*,<sup>1</sup> Vladislav A. Blatov\*,<sup>1</sup> Davide M. Proserpio\*<sup>2,1</sup>

1) Samara Center for Theoretical Materials Science (SCTMS), Samara University, Ac. Pavlov Street 1, Samara 443011, Russia.

2) Dipartimento di Chimica, Università degli Studi di Milano, Via C. Golgi 19, 20133, Milano, Italy.

e-mail : E.V. A. aleksandrov\_ev1@mail.ru, V.A.B. blatov@samsu.ru, D.M.P. davide.proserpio@unimi.it

## SUPPLEMENTARY INFORMATIONS

| Layer | Entang type | DOC, IS, Z  | HRN | ERN       | hits | RCSR    |
|-------|-------------|-------------|-----|-----------|------|---------|
| sql   | ICAT        | DOC 1/1 d/d | 2C1 | 6T13      | 105  | sql-c*  |
| sql   | ICAT        | DOC 1/1 p/p | 2C1 | 6-c sqc23 | 35   | sql-c   |
| sql   | ICAT        | DOC 2/2/2   | 2C1 | 6T225     | 3    | sql-c3* |
| sql   | ICAT        | DOC 1/1/1   | 2C1 | 6T225     | 5    | sql-c3  |
| hcb   | ICAT        | DOC 1/1     | 2C1 | 8T190     | 13   | hcb-c   |
| hcb   | ICAT        | DOC 1/1/1   | 2C1 | 8T758     | 2    | hcb-c3  |

Table S1: The correspondence between names ERN and RCSR for six entanglements of inclined polycatenation see <http://rcsr.net/nets> and C. Bonneau and M. O'Keeffe, *Acta Crystallogr., Sect. A: Found. Crystallogr.*, 2015, **71**, 82.

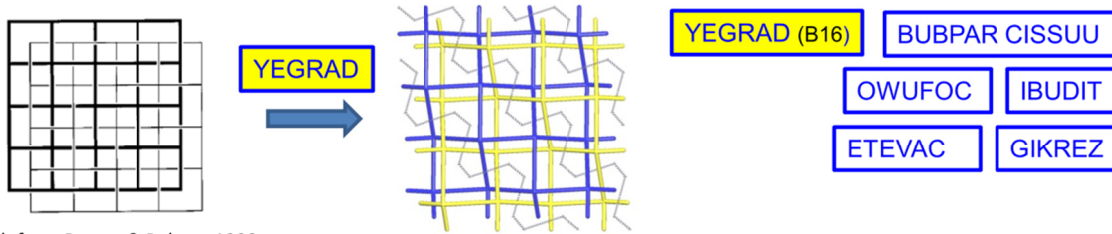

Figure 16b from Batten & Robson 1998:  
Schematic representation of the mode of interpenetration observed in YEGRAD

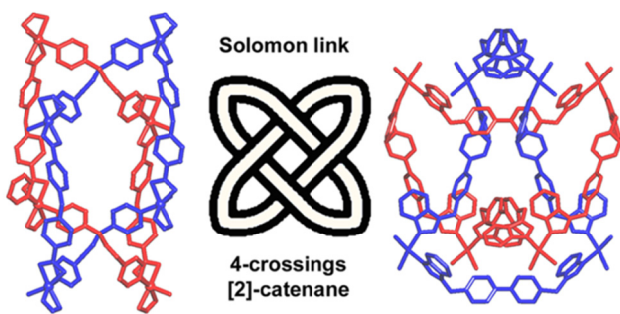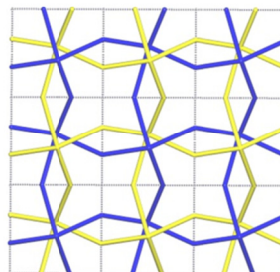

5 Solomon link A

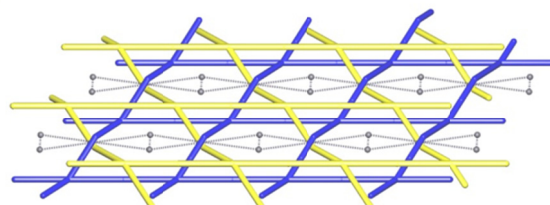

5 Solomon link B

**2-fold interpenetration sql**  
**8 less frequent patterns**

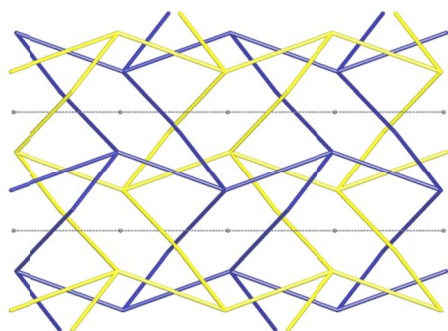

BUBPAR, CISSUU

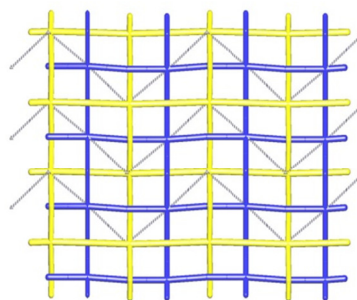

GIKREZ

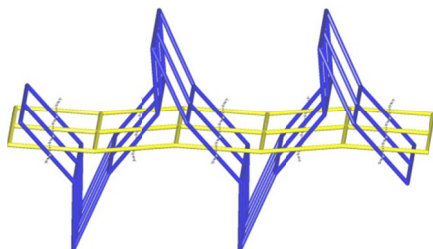

OWUFUC

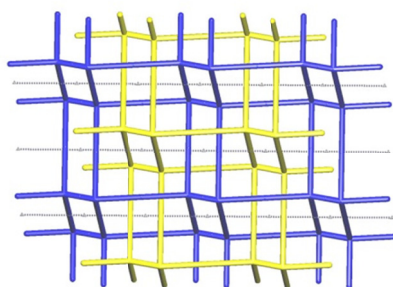

IBUDIT

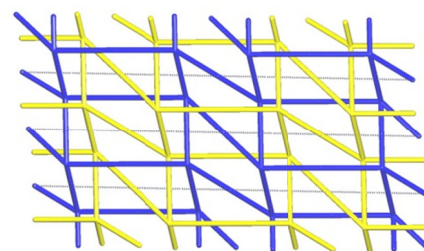

ETEVA

Figure S1. Eight less frequent patterns of catenation observed for 2-fold interpenetrated sql.

## Interpenetration: 2-fold sqI with 2-loops

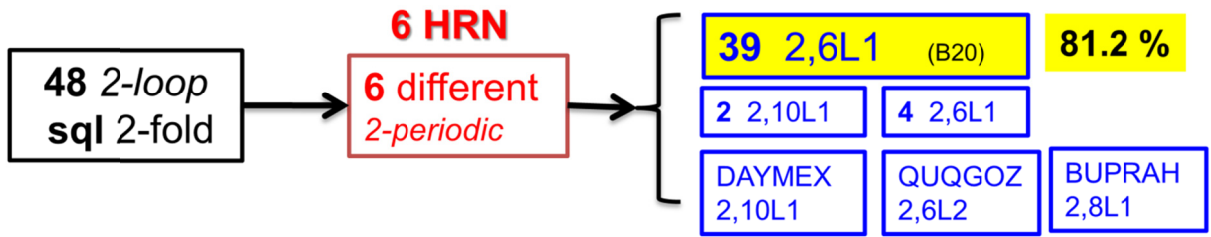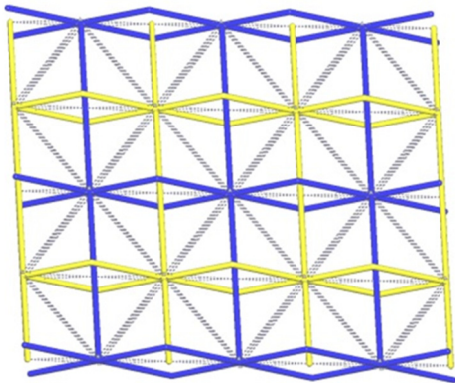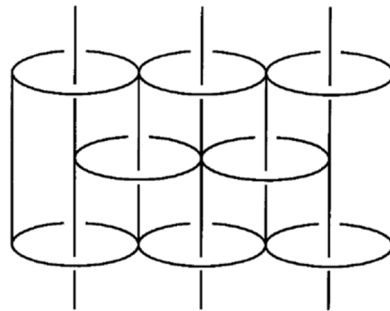

Figure 20 from Batten & Robson 1998

Figure 20. Schematic representation of the two parallel interpenetrating (4,4) nets in  $[\text{Mn}(\mathbf{3})_2](\text{ClO}_4)_2$  showing the polyrotaxane/polycatenane associations. Six-connected nodes are provided by six-coordinate Mn, and connections between the nodes by ligand **3**.

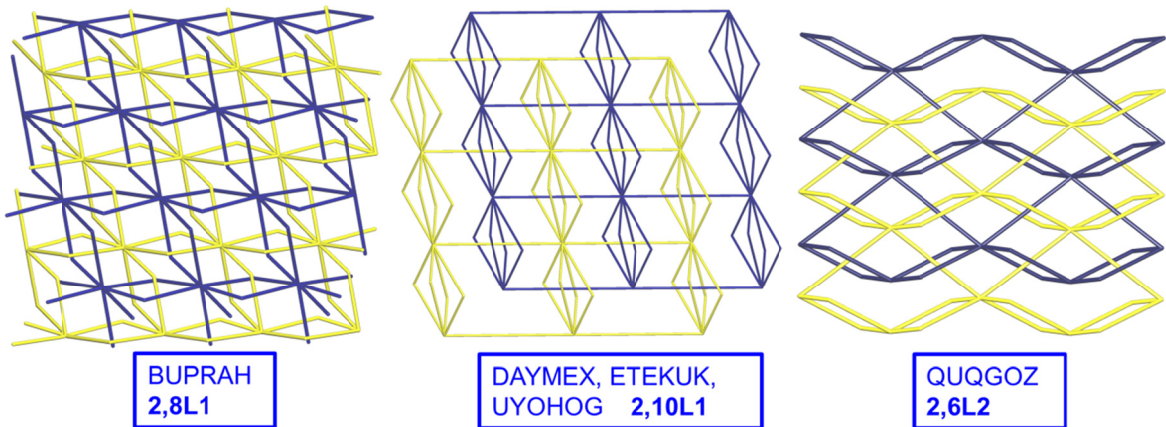

Figure S2. The classification of the patterns observed for the 48 2-fold interpenetrated sqI with 2-loops. The most frequent one is illustrated side by side with the representation of Batten & Robson.

# Interpenetration: 2-fold hcb with 2-loops

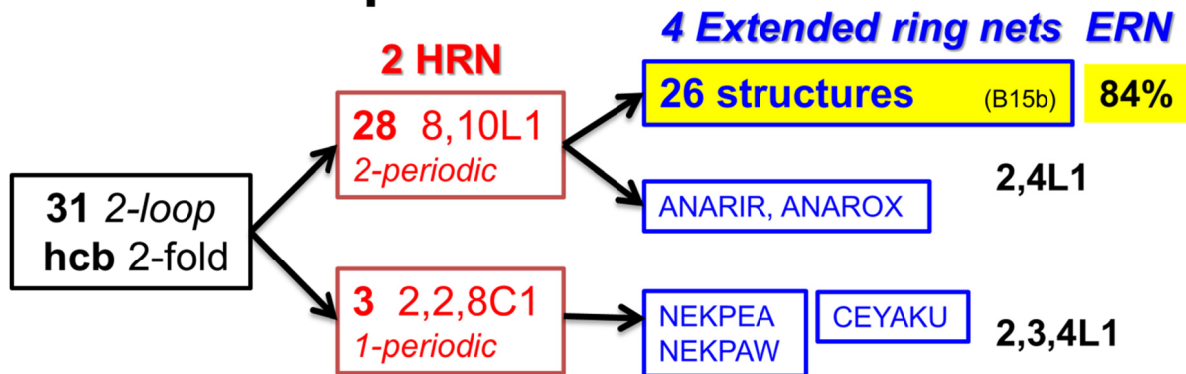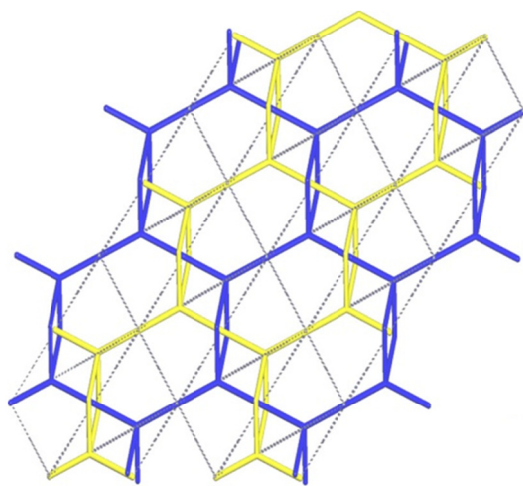

**2,4L1**

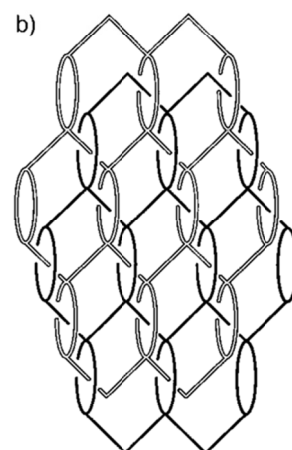

Figure 15b from Batten & Robson 1998:  
Schematic representation of the two interpenetrating nets observed in NEBSUI

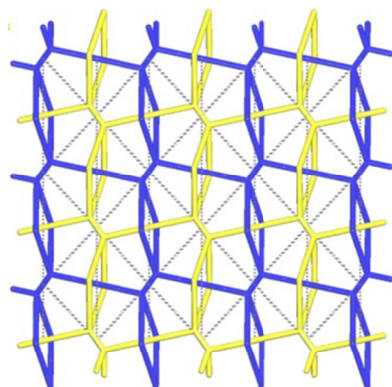

ANARIR, ANAROX

**2,4L1**

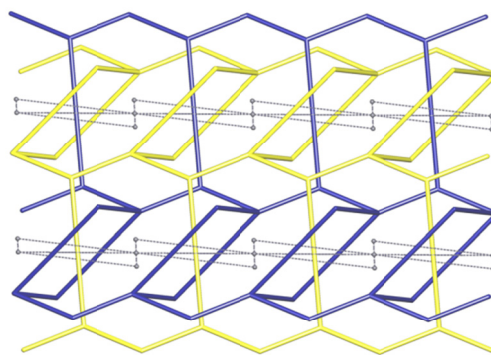

NEKPEA, NEKPAW CEYAKU

**2,3,4L1**

Figure S3. The classification of the patterns observed for the 31 2-fold interpenetrated hcb with 2-loops. The most frequent one is illustrated in the middle side by side with the representation of Batten & Robson.
